# Supplementary material for: Tandem [4 + 1 + 1] annulation and metal-free aerobic oxidative aromatization: straightforward synthesis of highly substituted phenols from one aldehyde and two ketones
Source: Royal Society of Chemistry journal article supplement (doi:10.1039/c0cc02313b), 2010-01-01

## Supporting information

# Tandem [4 + 1 + 1] annulation and metal-free aerobic oxidative aromatization: straightforward synthesis of highly substituted phenols from one aldehyde and two ketones

Mang Wang,\* Zhenqian Fu, Hui Feng, Ying Dong, Jun Liu, Qun Liu\*

*Department of Chemistry, Northeast Normal University, Changchun, 130024, China*

### Table of contents

|      |                                                                                                                         |     |
|------|-------------------------------------------------------------------------------------------------------------------------|-----|
| I.   | General.....                                                                                                            | S2  |
| II.  | Synthesis of phenols <b>5</b> from ketene dithioacetals <b>1</b> , aldehydes <b>2</b> and methyl ketones <b>3</b> ..... | S2  |
| III. | Analytical data of phenols <b>5</b> .....                                                                               | S3  |
| IV.  | References.....                                                                                                         | S12 |
| V.   | Copies of NMR spectra for new compounds <b>5</b> .....                                                                  | S13 |

## I. General

All reagents were purchased from commercial sources and used without treatment, unless otherwise indicated. The products were purified by column chromatography over silica gel (300–400 mesh). All reactions were monitored by TLC, which was performed on precoated aluminum sheets of silica gel 60 (F<sub>254</sub>). Melting points were uncorrected. <sup>1</sup>H NMR and <sup>13</sup>C NMR spectra were determined at ambient temperature on a Varian 500 MHz and 125 MHz, respectively, using TMS as internal standard. All shifts were given in ppm. IR spectra (KBr) were recorded on a Magna-560 FTIR spectrophotometer in the range of 400-4000 cm<sup>-1</sup>. Mass spectra were measured on an Agilent 1100 LCMsD spectrometer. Elemental analyses were obtained on a VarioEL analyzer. Starting materials **1** are known compounds and prepared according to the literatures.<sup>1</sup>

## II. Synthesis of phenols **5** from ketene dithioacetals **1**, aldehydes **2** and methyl ketones **3**

**Typical procedure for one-pot synthesis of phenols **5** (5a as example):** To a well-stirred mixture of benzaldehyde **2a** (0.11 mL, 1.1 mmol) with acetophenone **3a** (0.128 mL, 1.1 mmol) was added *t*-BuOK (56 mg, 0.5 mmol) at room temperature. After the reaction mixture was stirred at room temperature for 0.5 h, a mixture of 2-(bis(ethylthio)methylene)-1-phenylbutane-1,3-dione **1a** (294 mg, 1.0 mmol) and *t*-BuOK (392 mg, 3.5 equiv) in dry DMF (10 mL) was added and the resulting reaction mixture was stirred at room temperature for additional 2.5 h. After completion of the reaction as indicated by TLC, the reaction was quenched by saturated sodium chloride aqueous (20 mL), neutralized with dilute HCl aq., and extracted with dichloromethane (3 × 20 mL). The combined organic phase was

washed with water (3 × 20 mL), dried over MgSO<sub>4</sub> and concentrated in vacuo. The crude product was purified by flash chromatography (silica gel, petroleum ether : diethyl ether = 3:1) to give (3-(ethylthio)-5-hydroxybiphenyl-2,4-diyl)bis(phenylmethanone) **5a** (293 mg, 67%) as a yellow oil.

### III. Analytical data of phenols 5

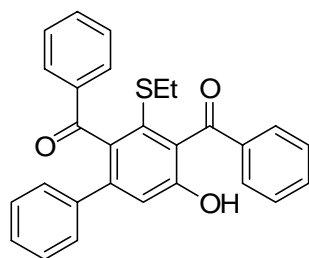

**(3-(Ethylthio)-5-hydroxybiphenyl-2,4-diyl)bis(phenylmethanone) (5a):** Yellow oil; <sup>1</sup>H NMR (CDCl<sub>3</sub>, 500 MHz)  $\delta$  = 0.75 (t, *J* = 7.5 Hz, 3H), 2.44–2.49 (m, 2H), 7.06 (s, 1H), 7.16–7.18 (m, 3H), 7.24–7.26 (m, 2H), 7.28–7.32 (m, 2H), 7.41–7.45 (m, 3H), 7.56–7.59 (m, 1H), 7.61–7.63 (m, 2H), 7.83–7.85 (m, 2H), 8.04 (s, 1H); <sup>13</sup>C NMR (CDCl<sub>3</sub>, 125 MHz)  $\delta$  = 197.9, 196.8, 156.2, 144.4, 138.5, 138.2, 137.9, 137.3, 133.4, 133.1, 132.4, 129.5 (2C), 129.3 (2C), 128.9 (3C), 128.5 (2C), 128.3 (2C), 128.2 (2C), 127.9, 118.5, 33.1, 13.9; IR (KBr)  $\nu$  = 3294, 3060, 2971, 2870, 1666, 1586, 1397, 1230, 1176; ES–MS: calcd *m/z* 438.1, found 439.1 [(M + 1)]<sup>+</sup>; Anal. Calcd for C<sub>28</sub>H<sub>22</sub>O<sub>3</sub>S: C, 76.69; H, 5.06. Found: C, 76.60; H, 5.10.

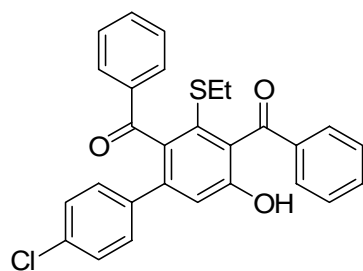

**(4'-Chloro-3-(ethylthio)-5-hydroxybiphenyl-2,4-diyl)bis(phenylmethanone)**

**(5b)**: yellow oil;  $^1\text{H}$  NMR ( $\text{CDCl}_3$ , 500 MHz)  $\delta$  = 0.77 (t,  $J$  = 7.5 Hz, 3H), 2.43–2.49 (m, 2H), 7.11 (s, 1H), 7.26–7.32 (m, 6H), 7.42–7.49 (m, 3H), 7.58–7.63 (m, 3H), 7.84 (d,  $J$  = 7.5 Hz, 2H), 7.94 (s, 1H);  $^{13}\text{C}$  NMR ( $\text{CDCl}_3$ , 125 MHz)  $\delta$  = 197.8, 196.6, 156.1, 142.9, 138.1, 137.8, 137.2, 136.9, 134.2, 133.6, 133.4, 132.5, 130.3 (2C), 129.5 (2C), 129.3 (2C), 128.7 (2C), 128.5 (2C), 128.4 (3C), 118.4, 33.1, 14.0; IR (KBr)  $\nu$  = 3377, 2967, 2869, 1665, 1585, 1448, 1314, 1229; ES–MS: calcd  $m/z$  472.1, found 473.1  $[(M + 1)]^+$ ; Anal. Calcd for  $\text{C}_{28}\text{H}_{21}\text{ClO}_3\text{S}$ : C, 71.10; H, 4.48. Found: C, 71.19; H, 4.39.

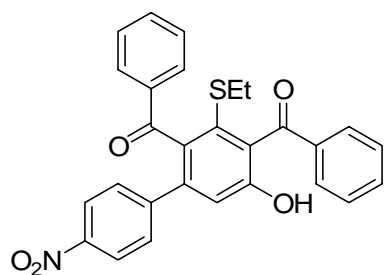

**(3-(Ethylthio)-5-hydroxy-4'-nitrophenyl-2,4-diyl)bis(phenylmethanone) (5c)**: yellow solid. Mp 218–220 °C;  $^1\text{H}$  NMR ( $\text{CDCl}_3$ , 500 MHz)  $\delta$  = 0.75 (t,  $J$  = 7.5 Hz, 3H), 2.41 (q,  $J$  = 7.5 Hz 2H), 7.15–7.18 (m, 1H), 7.33 (s, 1H), 7.37–7.41 (m, 6H), 7.51–7.54 (m, 2H), 7.73–7.76 (m, 3H), 8.06–8.07 (m, 2H), 10.55 (s, 1H);  $^{13}\text{C}$  NMR ( $\text{CDCl}_3$ , 125 MHz)  $\delta$  = 198.1, 195.8, 154.9, 154.1, 145.4, 138.0, 137.9, 137.2, 135.2, 133.8, 133.6, 132.8, 131.9, 129.9 (2C), 129.7, 129.4 (2C), 128.6 (2C), 128.5 (2C), 126.9, 125.2, 121.3, 120.4, 32.8, 14.1; IR (KBr)  $\nu$  = 3459, 3250, 2960, 2862, 1670, 1584, 1442, 1219; ES–MS: calcd  $m/z$  483.1, found 484.1  $[(M + 1)]^+$ ; Anal. Calcd for  $\text{C}_{28}\text{H}_{21}\text{NO}_5\text{S}$ : C, 69.55; H, 4.38; N, 2.90. Found: C, 69.46; H, 4.30; N, 2.79.

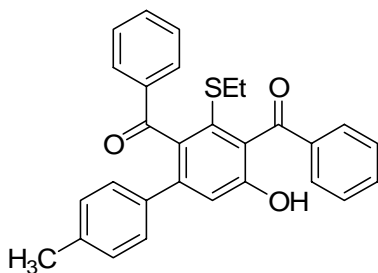

**(3-(Ethylthio)-5-hydroxy-4'-methylbiphenyl-2,4-diyl)bis(phenylmethanone) (5d):**

yellow solid. Mp 95–97 °C;  $^1\text{H}$  NMR ( $\text{CDCl}_3$ , 500 MHz)  $\delta$  = 0.75 (t,  $J$  = 7.5 Hz, 3H), 2.26 (s, 3H), 2.41–2.48 (m, 2H), 7.02 (d,  $J$  = 7.5 Hz, 2H), 7.09 (s, 1H), 7.18 (d,  $J$  = 7.5 Hz, 2H), 7.29–7.38 (m, 2H), 7.43–7.46 (m, 3H), 7.58 (t,  $J$  = 7.5 Hz, 1H), 7.64 (d,  $J$  = 7.5 Hz, 2H), 7.83 (d,  $J$  = 7.5 Hz, 2H) 7.99 (s, 1H);  $^{13}\text{C}$  NMR ( $\text{CDCl}_3$ , 125 MHz)  $\delta$  = 198.1, 196.7, 156.3, 144.6, 138.4, 138.0, 137.9, 137.4, 135.6, 133.4, 133.0, 132.5, 129.4 (2C), 129.3 (2C), 128.9 (2C), 128.8 (2C), 128.5 (2C), 128.3 (2C), 127.7, 118.5, 33.1, 21.1, 14.0; IR (KBr)  $\nu$  = 3266, 3058, 2963, 2866, 1666, 1584, 1447, 1227; ES–MS: calcd  $m/z$  452.1, found 453.2  $[(M + 1)]^+$ ; Anal. Calcd for  $\text{C}_{29}\text{H}_{24}\text{O}_3\text{S}$ : C, 76.96; H, 5.35. Found: C, 76.85; H, 5.46.

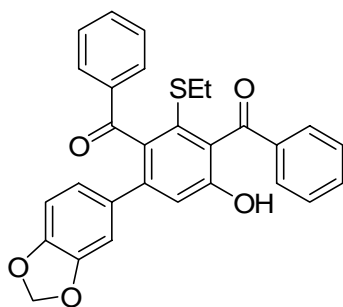

**(4-(Benzo[*d*][1,3]dioxol-5-yl)-2-(ethylthio)-6-hydroxy-1,3-phenylene)bis(phenylmethanone) (5e):** yellow solid. Mp 61–63 °C;  $^1\text{H}$  NMR ( $\text{CDCl}_3$ , 500 MHz)  $\delta$  = 0.76 (t,  $J$  = 7.5 Hz, 3H), 2.44 (s, 2H), 5.90 (s, 2H), 6.65 (d,  $J$  = 8.0 Hz, 1H), 6.77 (d,  $J$  = 8.5 Hz, 1H), 7.06 (s, 1H), 7.20–7.26 (m, 2H), 7.31–7.34 (m, 2H), 7.37–7.47 (m, 2H), 7.58 (t,  $J$  = 7.0 Hz, 1H), 7.63 (d,  $J$  = 8.0 Hz, 2H), 7.82 (d,  $J$  = 8.0 Hz, 2H), 7.98 (s, 1H);  $^{13}\text{C}$  NMR ( $\text{CDCl}_3$ , 125 MHz)  $\delta$  = 197.8, 196.8, 156.0, 147.4, 143.7, 138.1,

137.8, 137.1, 133.4, 133.1, 132.3, 129.4 (2C), 129.3 (2C), 128.4 (2C), 128.3 (2C), 128.0, 127.2, 125.3, 123.0, 118.3, 109.3, 108.0, 101.1, 33.0, 13.9; IR (KBr)  $\nu$  = 3386, 3061, 2965, 2779, 1664, 1585, 1495, 1240; ES-MS: calcd  $m/z$  482.1, found 483.1 [(M + 1)]<sup>+</sup>; Anal. Calcd for C<sub>29</sub>H<sub>22</sub>O<sub>5</sub>S: C, 72.18; H, 4.60. Found: C, 72.27; H, 4.49.

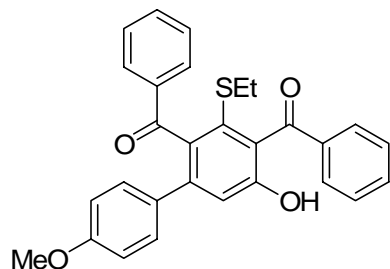

**(3-(Ethylthio)-5-hydroxy-4'-methoxybiphenyl-2,4-diyl)bis(phenylmethanone)**

**(5f):** Yellow oil; <sup>1</sup>H NMR (CDCl<sub>3</sub>, 500 MHz)  $\delta$  = 0.75 (t,  $J$  = 7.5 Hz, 3H), 2.41–2.47 (m, 2H), 3.74 (s, 3H), 6.76(d,  $J$  = 9.0 Hz, 2H), 7.08 (s, 1H), 7.24 (t,  $J$  = 8.0 Hz, 2H), 7.31 (t,  $J$  = 8.0 Hz, 2H), 7.43–7.49 (m, 3H), 7.58–7.63 (m, 3H), 7.83 (d,  $J$  = 7.0 Hz, 2H), 8.05 (s, 1H); <sup>13</sup>C NMR (CDCl<sub>3</sub>, 125 MHz)  $\delta$  = 198.2, 196.9, 159.4, 156.4, 144.2, 138.4, 137.9, 137.3, 133.4, 133.1, 132.6, 130.9 (2C), 130.2 (2C), 129.5 (2C), 129.3 (2C), 128.5 (2C), 128.3 (2C), 127.4, 118.4, 113.7, 55.1, 33.1, 14.0; IR (KBr)  $\nu$  = 3383, 3060, 2963, 1664, 1583, 1514, 1393, 1297, 1249; ES-MS: calcd  $m/z$  468.1, found 469.1 [(M + 1)]<sup>+</sup>; Anal. Calcd for C<sub>29</sub>H<sub>24</sub>O<sub>4</sub>S: C, 74.34; H, 5.16. Found: C, 74.45; H, 5.07.

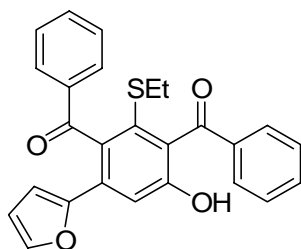

**(2-(Ethylthio)-4-(furan-2-yl)-6-hydroxy-1,3-phenylene)bis(phenylmethanone)**

**(5g):** yellow solid. Mp 99–101 °C; <sup>1</sup>H NMR (CDCl<sub>3</sub>, 500 MHz)  $\delta$  = 0.74 (t,  $J$  = 7.5 Hz, 3H), 2.36–2.47 (m, 2H), 6.27–6.28 (m, 1H), 6.47 (d,  $J$  = 3.5 Hz, 1H), 7.34 (s, 1H),

7.39–7.46 (m, 4H), 7.49 (s, 1H), 7.52–7.58 (m, 2H), 7.77–7.80 (m, 4H), 8.12 (s, 1H);  
 $^{13}\text{C}$  NMR ( $\text{CDCl}_3$ , 125 MHz)  $\delta$  = 197.8, 196.8, 156.5, 149.6, 143.3, 138.3, 137.6,  
134.2, 133.3, 132.8, 132.0, 129.4 (2C), 129.2 (2C), 128.5 (2C), 128.4 (2C), 128.3,  
128.0, 114.2, 112.0, 110.9, 33.1, 13.9; IR (KBr)  $\nu$  = 3253, 3061, 2959, 2866, 1665,  
1587, 1448, 1312, 1231; ES–MS: calcd  $m/z$  428.1, found 429.1  $[(\text{M} + 1)]^+$ ; Anal.  
Calcd for  $\text{C}_{26}\text{H}_{20}\text{O}_4\text{S}$ : C, 72.88; H, 4.70. Found: C, 72.80; H, 4.79.

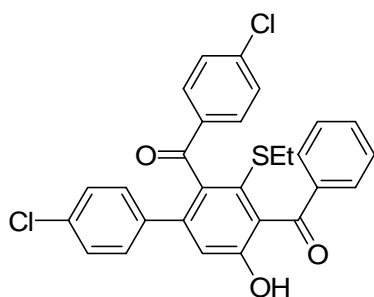

**(4-Benzoyl-4'-chloro-3-(ethylthio)-5-hydroxybiphenyl-2-yl)(4-chlorophenyl)methanone (5h):** yellow solid. Mp 96–98 °C;  $^1\text{H}$  NMR ( $\text{CDCl}_3$ , 500 MHz)  $\delta$  = 0.78 (t,  $J$  = 7.5 Hz, 3H), 2.45 (s, 2H), 7.06 (s, 1H), 7.22 (s, 4H), 7.30 (d,  $J$  = 8.5 Hz, 2H), 7.45–7.49 (m, 2H), 7.55 (d,  $J$  = 8.5 Hz, 2H), 7.60 (t,  $J$  = 7.5 Hz, 1H), 7.82 (d,  $J$  = 7.5 Hz, 2H), 7.94 (s, 1H);  $^{13}\text{C}$  NMR ( $\text{CDCl}_3$ , 125 MHz)  $\delta$  = 197.7, 195.4, 156.0, 142.7, 139.8, 137.8, 136.7, 136.6, 136.0, 134.4, 133.7, 132.2, 130.5 (2C), 130.2 (2C), 129.4 (2C), 128.9, 128.8 (2C), 128.6 (2C), 128.5 (2C), 118.4, 33.1, 14.0; IR (KBr)  $\nu$  = 3303, 2928, 2870, 1666, 1585, 1229, 1092; ES–MS: calcd  $m/z$  506.1, found 507.1  $[(\text{M} + 1)]^+$ ; Anal. Calcd for  $\text{C}_{28}\text{H}_{20}\text{Cl}_2\text{O}_3\text{S}$ : C, 66.28; H, 3.97. Found: C, 66.19; H, 4.08.

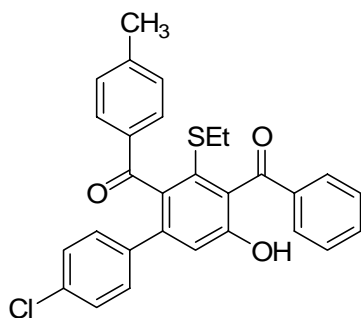

**(4-Benzoyl-4'-chloro-3-(ethylthio)-5-hydroxybiphenyl-2-yl)(p-tolyl)methanone**

**(5i):** yellow solid. Mp 93–95 °C;  $^1\text{H}$  NMR ( $\text{CDCl}_3$ , 500 MHz)  $\delta$  = 0.75 (t,  $J$  = 7.5 Hz, 3H), 2.32 (s, 3H), 2.42–2.52 (m, 2H), 7.00 (s, 1H), 7.10–7.18 (m, 6H), 7.24–7.26 (m, 1H), 7.44 (t,  $J$  = 7.5 Hz, 2H), 7.52 (d,  $J$  = 7.5 Hz, 2H), 7.57 (t,  $J$  = 7.0 Hz, 1H), 7.83 (d,  $J$  = 7.5 Hz, 2H);  $^{13}\text{C}$  NMR ( $\text{CDCl}_3$ , 125 MHz)  $\delta$  = 197.0, 196.9, 155.0, 144.5, 141.8, 137.4, 137.0, 136.7, 135.2, 133.8, 133.6, 131.0, 130.5, 130.1 (2C), 129.5 (2C), 129.4 (2C), 129.1 (2C), 128.5 (2C), 128.2 (2C), 118.1, 33.0, 21.6, 13.8; IR (KBr)  $\nu$  = 3388, 3059, 2964, 1662, 1578, 1445, 1312, 1228; ES–MS: calcd  $m/z$  486.1, found 487.1  $[(M + 1)]^+$ ; Anal. Calcd for  $\text{C}_{29}\text{H}_{23}\text{ClO}_3\text{S}$ : C, 71.52; H, 4.76. Found: C, 71.63; H, 4.82.

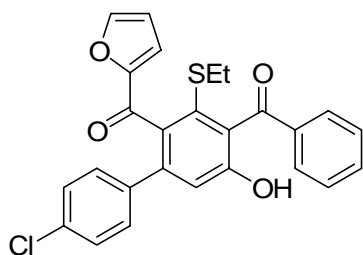

**(4-Benzoyl-4'-chloro-3-(ethylthio)-5-hydroxybiphenyl-2-yl)(furan-2-yl)methanone**

**(5j):** yellow solid. Mp 97–99 °C;  $^1\text{H}$  NMR ( $\text{CDCl}_3$ , 500 MHz)  $\delta$  = 0.85 (t,  $J$  = 7.5 Hz, 3H), 2.48–2.55 (m, 2H), 6.38 (d,  $J$  = 3.0 Hz, 1H), 6.79 (s, 1H), 7.06 (s, 1H), 7.26–7.32 (m, 4H), 7.45–7.48 (m, 3H), 7.60 (t,  $J$  = 7.5 Hz, 1H), 7.83 (d,  $J$  = 7.5 Hz, 2H), 7.97 (s, 1H);  $^{13}\text{C}$  NMR ( $\text{CDCl}_3$ , 125 MHz)  $\delta$  = 197.9, 183.7, 156.5, 153.4, 146.8, 144.6, 138.3, 138.2, 136.3, 133.3, 133.1, 129.3, 128.7 (2C), 128.5, 128.4 (2C), 128.2 (2C), 128.0, 127.7, 119.3, 118.4, 112.2, 33.0, 14.0; IR (KBr)  $\nu$  = 3312, 3061, 2864, 1662, 1584, 1453, 1314, 1227; ES–MS: calcd  $m/z$  462.1, found 463.1  $[(M + 1)]^+$ ; Anal. Calcd for  $\text{C}_{26}\text{H}_{19}\text{ClO}_4\text{S}$ : C, 67.45; H, 4.14. Found: C, 67.54; H, 4.06.



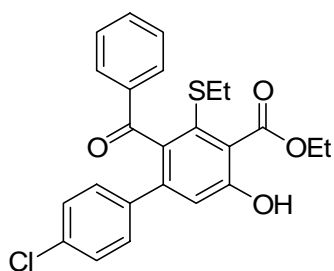

**Ethyl 2-benzoyl-4'-chloro-3-(ethylthio)-5-hydroxybiphenyl-4-carboxylate (5k):**

yellow oil;  $^1\text{H}$  NMR ( $\text{CDCl}_3$ , 500 MHz)  $\delta$  = 1.02 (t,  $J$  = 7.5 Hz, 3H), 1.15 (t,  $J$  = 7.0 Hz, 3H), 2.75 (s, 2H), 4.50 (q,  $J$  = 7.0 Hz, 2H), 7.01 (s, 1H), 7.16 (s, 4H), 7.31 (t,  $J$  = 7.0 Hz, 2H), 7.44 (t,  $J$  = 7.0 Hz, 1H), 7.59 (d,  $J$  = 8.0 Hz, 2H), 10.46 (s, 1H);  $^{13}\text{C}$  NMR ( $\text{CDCl}_3$ , 125 MHz)  $\delta$  = 195.5, 169.7, 160.7, 144.2, 138.4, 138.0, 136.6, 134.3, 133.7, 133.0, 130.2 (2C), 129.1 (2C), 128.4 (2C), 128.3 (2C), 119.5, 117.5, 62.4, 33.1, 14.0, 13.9; IR (KBr)  $\nu$  = 3385, 3060, 2964, 2865, 1664, 1589, 1446, 1241; ES-MS: calcd  $m/z$  440.1, found 441.1  $[(M + 1)]^+$ ; Anal. Calcd for  $\text{C}_{24}\text{H}_{21}\text{ClO}_4\text{S}$ : C, 65.37; H, 4.80. Found: C, 65.28; H, 4.89.

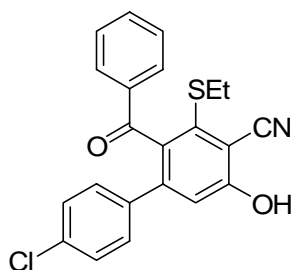

**2-Benzoyl-4'-chloro-3-(ethylthio)-5-hydroxybiphenyl-4-carbonitrile (5l):**

yellow oil;  $^1\text{H}$  NMR ( $\text{CDCl}_3$ , 500 MHz)  $\delta$  = 1.14 (t,  $J$  = 7.5 Hz, 3H), 2.91 (s, 2H), 7.00 (s, 1H), 7.13–7.19 (m, 4H), 7.34–7.39 (m, 3H), 7.47–7.52 (m, 1H), 7.59 (d,  $J$  = 8.0 Hz, 2H);  $^{13}\text{C}$  NMR ( $\text{CDCl}_3$ , 125 MHz)  $\delta$  = 195.3, 159.4, 145.1, 137.9, 137.3, 136.8, 136.2, 134.8, 133.7, 130.0 (2C), 129.5 (2C), 129.3 (2C), 128.6 (2C), 117.9, 114.6, 106.1, 32.0, 14.5; IR (KBr)  $\nu$  = 3422, 2958, 2859, 1653, 1578, 1489, 1393, 1260; ES-MS: calcd  $m/z$  393.1, found 394.1  $[(M + 1)]^+$ ; Anal. Calcd for

C<sub>22</sub>H<sub>16</sub>ClNO<sub>2</sub>S: C, 67.08; H, 4.09; N, 3.56. Found: C, 67.20; H, 4.00; N, 3.61.

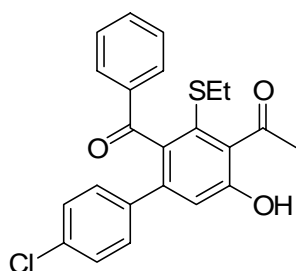

**1-(2-Benzoyl-4'-chloro-3-(ethylthio)-5-hydroxybiphenyl-4-yl)ethanone (5m):**

Yellow oil; <sup>1</sup>H NMR (CDCl<sub>3</sub>, 500 MHz)  $\delta$  = 0.99 (t,  $J$  = 7.5 Hz, 3H), 2.64–2.66 (m, 2H), 2.95 (s, 3H), 7.02 (s, 1H), 7.16–7.19 (m, 4H), 7.33 (t,  $J$  = 7.5 Hz, 2H), 7.44–7.49 (m, 2H), 7.61 (d,  $J$  = 7.5 Hz, 2H); <sup>13</sup>C NMR (CDCl<sub>3</sub>, 125 MHz)  $\delta$  = 206.5, 195.9, 160.0, 144.5, 137.7, 136.6, 134.5, 133.7, 133.3, 130.2 (2C), 129.1 (2C), 129.0 (2C), 128.5 (3C), 125.3, 119.7, 33.9, 32.7, 14.2; IR (KBr)  $\nu$  = 3251, 3064, 2970, 2870, 1669, 1581, 1494, 1316, 1216; ES–MS: calcd  $m/z$  410.1, found 411.1 [(M + 1)]<sup>+</sup>; Anal. Calcd for C<sub>23</sub>H<sub>19</sub>ClO<sub>3</sub>S: C, 67.23; H, 4.66. Found: C, 67.40; H, 4.55.

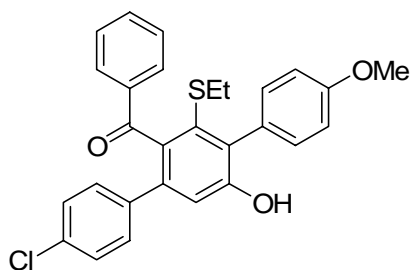

**4-Methoxy-2'-ethylthio-3'-benzoyl-6'-hydroxy-4''-chloro p-terphenyl (5n):**

yellow oil; <sup>1</sup>H NMR (CDCl<sub>3</sub>, 500 MHz)  $\delta$  = 0.74 (t,  $J$  = 7.5 Hz, 3H), 2.20 (m, 2H), 3.87 (s, 3H), 5.31 (s, 1H), 7.01 (s, 1H), 7.06 (d,  $J$  = 8.5 Hz, 2H), 7.17 (d,  $J$  = 8.0 Hz, 2H), 7.22 (d,  $J$  = 8.0 Hz, 2H), 7.30–7.33 (m, 2H), 7.34–7.38 (m, 2H), 7.39–7.46 (m, 1H), 7.67 (d,  $J$  = 8.5 Hz, 2H); <sup>13</sup>C NMR (CDCl<sub>3</sub>, 125 MHz)  $\delta$  = 196.8, 159.6, 153.7, 139.7, 138.2, 137.6, 137.0, 133.6, 132.9, 132.0, 131.8, 131.7 (2C), 130.3 (2C), 129.3 (2C), 128.3 (2C), 128.2 (2C), 125.4, 117.0, 114.6 (2C), 55.2, 30.4, 14.0; IR (KBr)  $\nu$  =

3415, 3060, 2835, 1651, 1591, 1444, 1245, 1173; ES–MS: calcd  $m/z$  474.1, found 475.2  $[(M + 1)]^+$ ; Anal. Calcd for  $C_{28}H_{23}ClO_3S$ : C, 70.80; H, 4.88. Found: C, 70.91; H, 4.80.

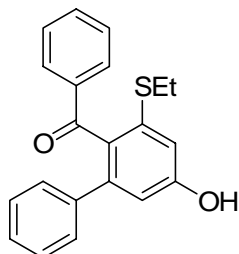

**(3-(Ethylthio)-5-hydroxybiphenyl-2-yl)(phenyl)methanone (5o):** yellow oil;  $^1H$  NMR ( $CDCl_3$ , 500 MHz)  $\delta$  = 1.56 (t,  $J$  = 7.5 Hz, 3H), 2.80 (q,  $J$  = 7.5 Hz, 2H), 6.72 (d,  $J$  = 2.0 Hz, 1H), 6.95 (d,  $J$  = 2.0 Hz, 1H), 7.09–7.17 (m, 5H), 7.23–7.26 (m, 3H), 7.38 (t,  $J$  = 7.5 Hz, 1H), 7.60 (d,  $J$  = 7.5 Hz, 2H);  $^{13}C$  NMR ( $CDCl_3$ , 125 MHz)  $\delta$  = 199.5, 156.6, 142.6, 139.4, 137.8, 136.5, 133.1, 129.5 (2C), 128.9 (2C), 128.2 (2C), 128.0 (2C), 127.5 (2C), 115.2, 114.9, 28.5, 13.9; IR (KBr)  $\nu$  = 3395, 3055, 2978, 1627, 1589, 1267, 1218, 1068; ES–MS: calcd  $m/z$  334.1, found 335.1  $[(M + 1)]^+$ ; Anal. Calcd for  $C_{21}H_{18}O_2S$ : C, 75.42; H, 5.43. Found: C, 75.32; H, 5.40.

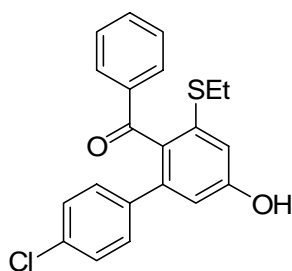

**(4'-Chloro-3-(ethylthio)-5-hydroxybiphenyl-2-yl)(phenyl)methanone (5p):** yellow oil;  $^1H$  NMR ( $CDCl_3$ , 500 MHz)  $\delta$  = 1.22 (t,  $J$  = 7.5 Hz, 3H), 2.86 (q,  $J$  = 7.5 Hz, 2H), 5.99 (s, 1H), 6.69 (s, 1H), 6.98 (s, 1H), 7.14 (s, 4H), 7.14–7.33 (m, 2H), 7.45–7.48 (m, 1H), 7.62–7.64 (m, 2H);  $^{13}C$  NMR ( $CDCl_3$ , 125 MHz)  $\delta$  = 198.1, 156.3, 141.3, 137.8, 137.7, 136.7, 133.7, 133.3, 132.6, 130.2 (2C), 129.5 (2C), 128.3

(2C), 128.2 (2C), 115.6, 114.8, 28.7, 13.9; IR (KBr)  $\nu = 3386, 3060, 2869, 1645, 1588, 1309, 1169$ ; ES-MS: calcd  $m/z$  368.1, found 369.1  $[(M + 1)]^+$ ; Anal. Calcd for  $C_{21}H_{17}ClO_2S$ : C, 68.38; H, 4.65. Found: C, 68.26; H, 4.72.

#### IV. References

1 (a) H. Yu, D. Dong, Y. Ouyang, Q. Liu, Y. Wang, *Lett. Org. Chem.*, 2005, **2**, 755–759; (b) Z. Fu, M. Wang, Y. Ma, Q. Liu, J. Liu, *J. Org. Chem.*, 2008, **73**, 7625–7630; (c) Z. Fu, M. Wang, Y. Dong, J. Liu, Q. Liu, *J. Org. Chem.*, 2009, **74**, 6105–6110.



5b

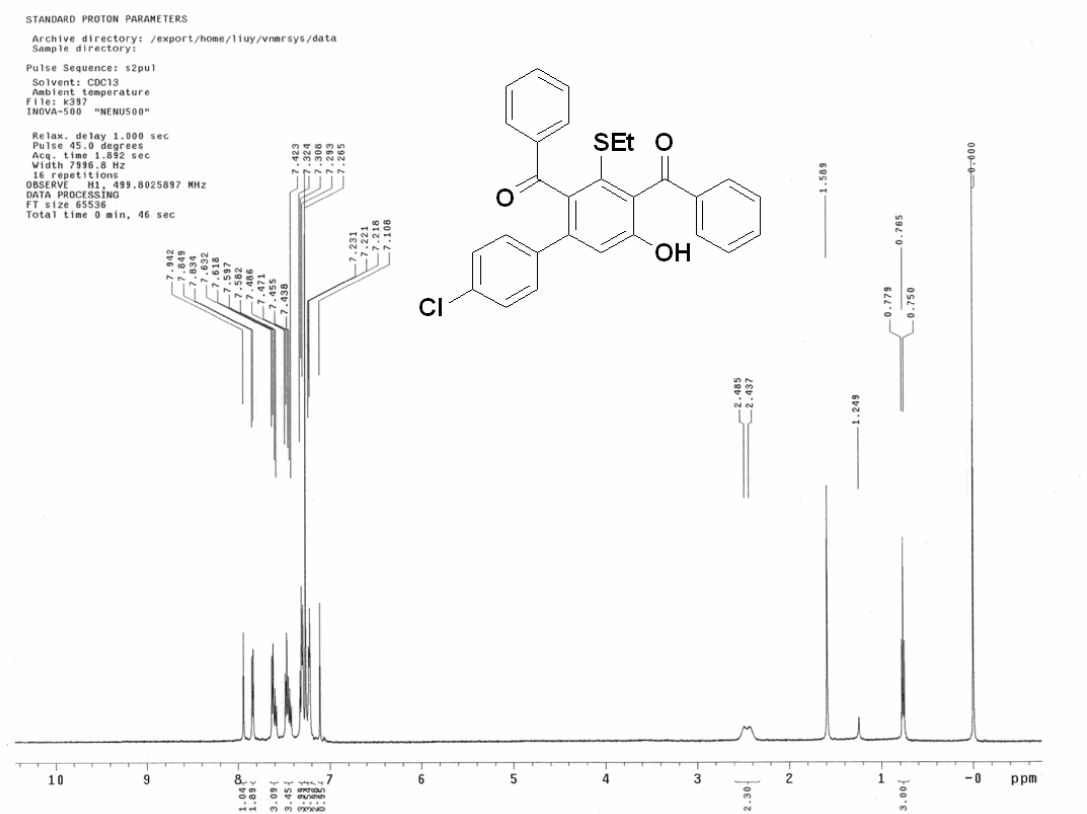

STANDARD CARBON PARAMETERS  
Archive directory: /export/home/lily/vmr/sys/data  
Sample directory:  
Pulse Sequence: s2pul  
Solvent: CDCl3  
Ambient temperature  
User: 1-14-87  
File: j328  
INOVA-500 "NENU500"

Relax. delay 0.300 sec  
Pulse 45.0 degree  
Acq. time 1.309 sec  
Width 31421.8 Hz  
384 repetitions  
OBSERVE C13: 125.6754851 MHz  
DECOUPLE M1: 499.8059909 MHz  
Power 40 dB  
continuously on  
MULTI-16 modulated  
DATA PROCESSING  
Line broadening 1.5 Hz  
FT size 131072  
Total time 1 hr, 48 min, 51 sec

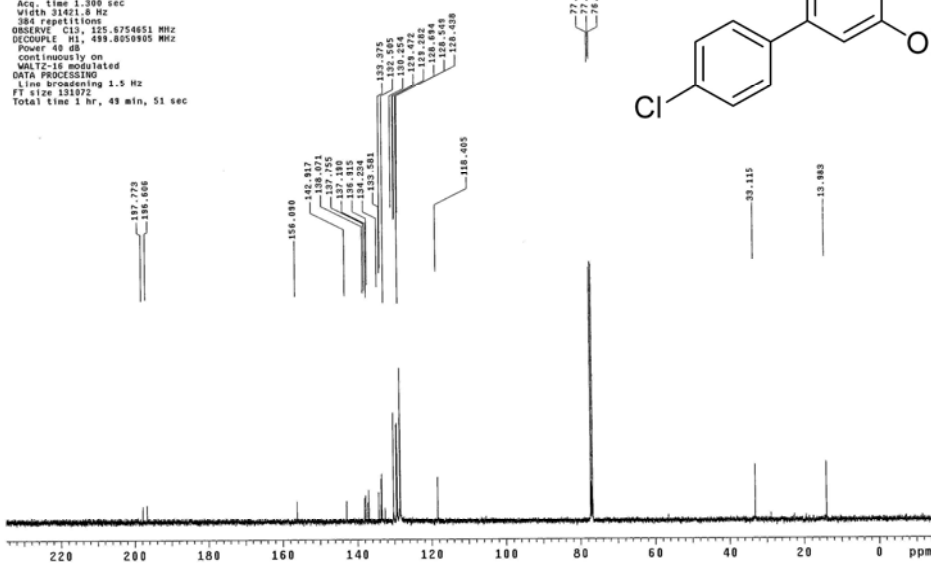

5c

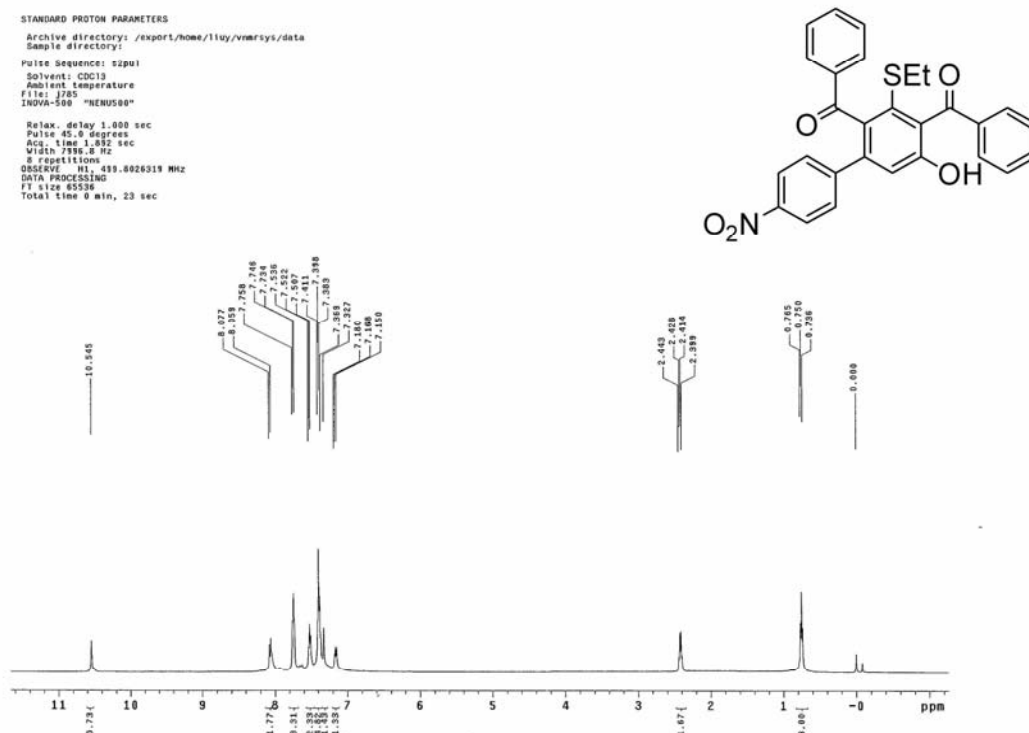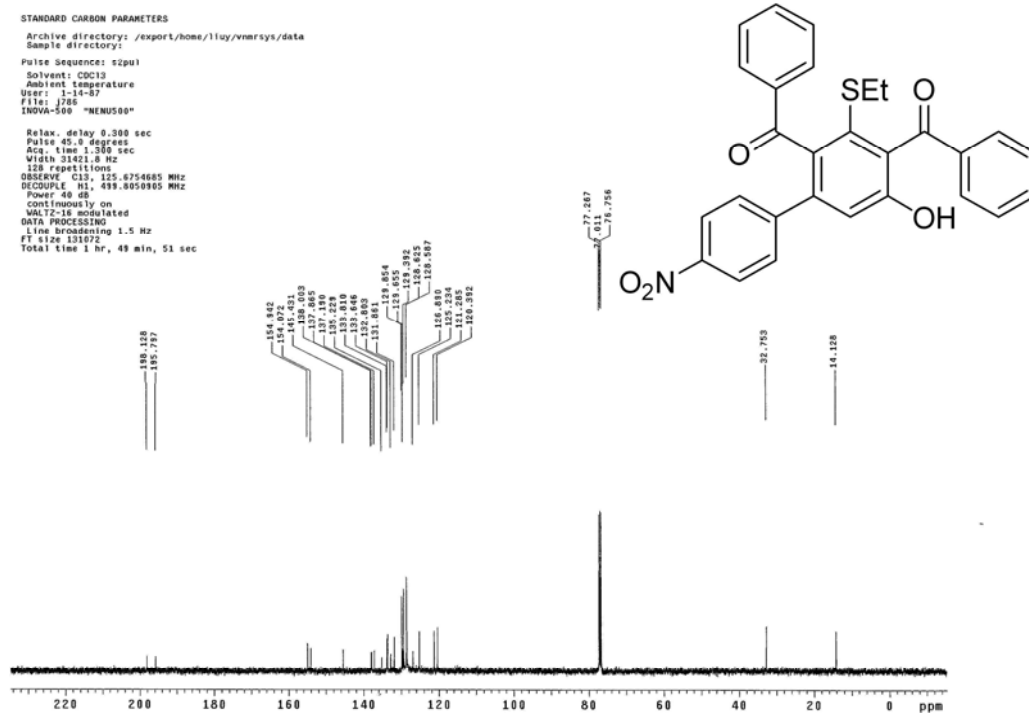

5d

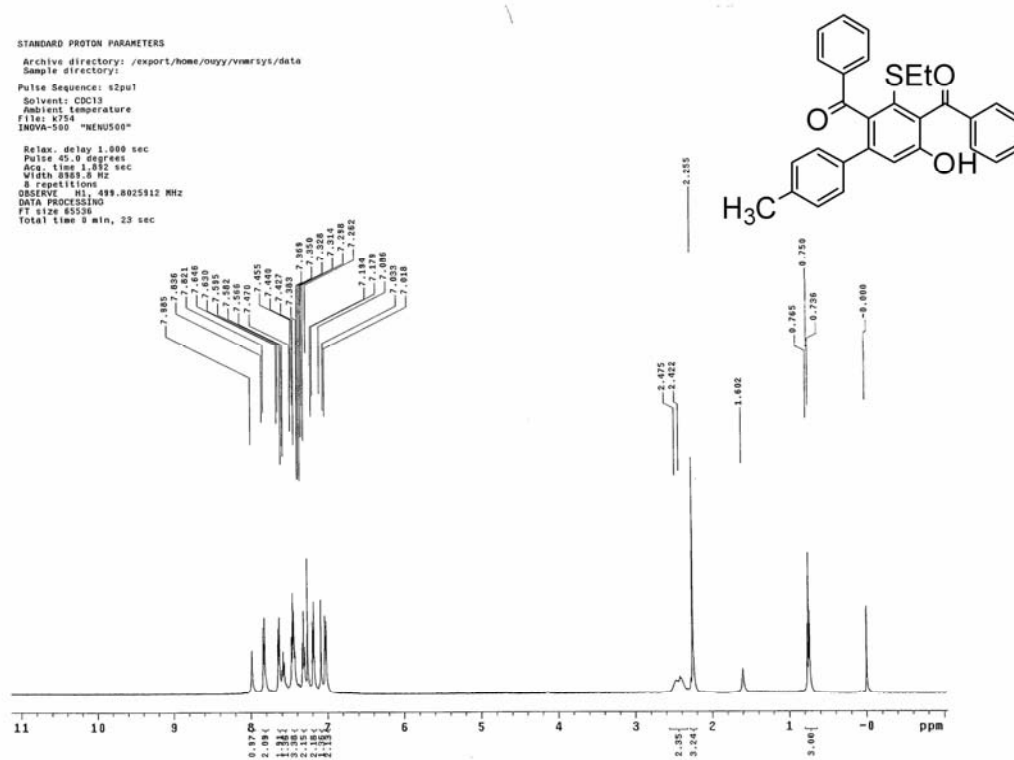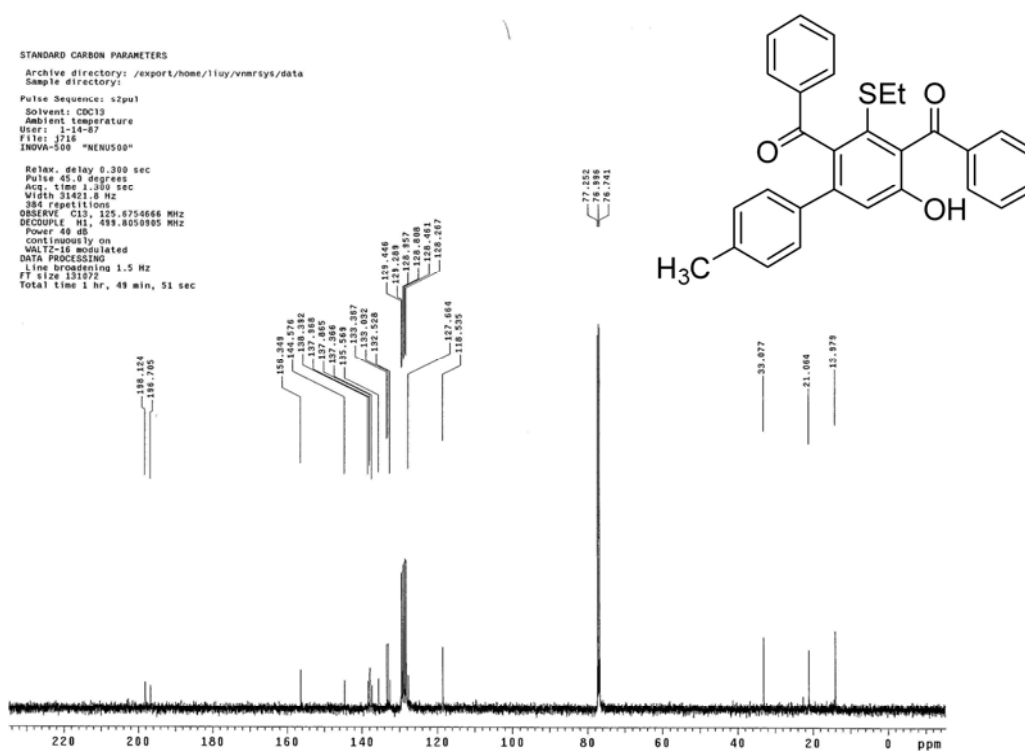



5e

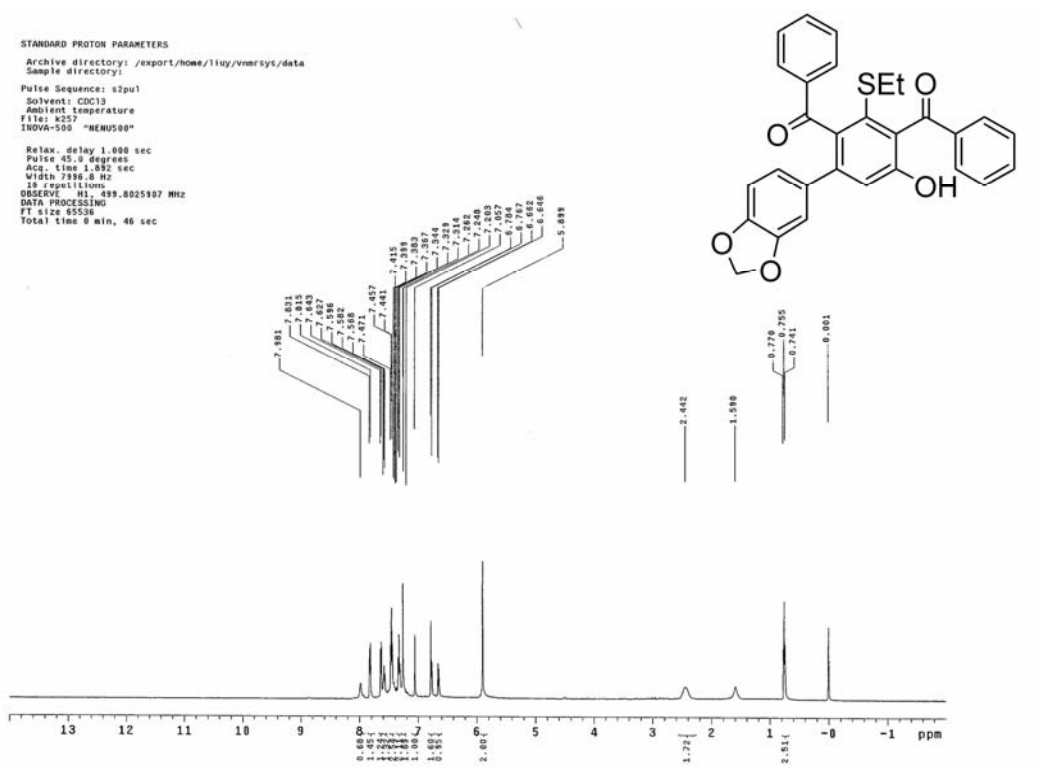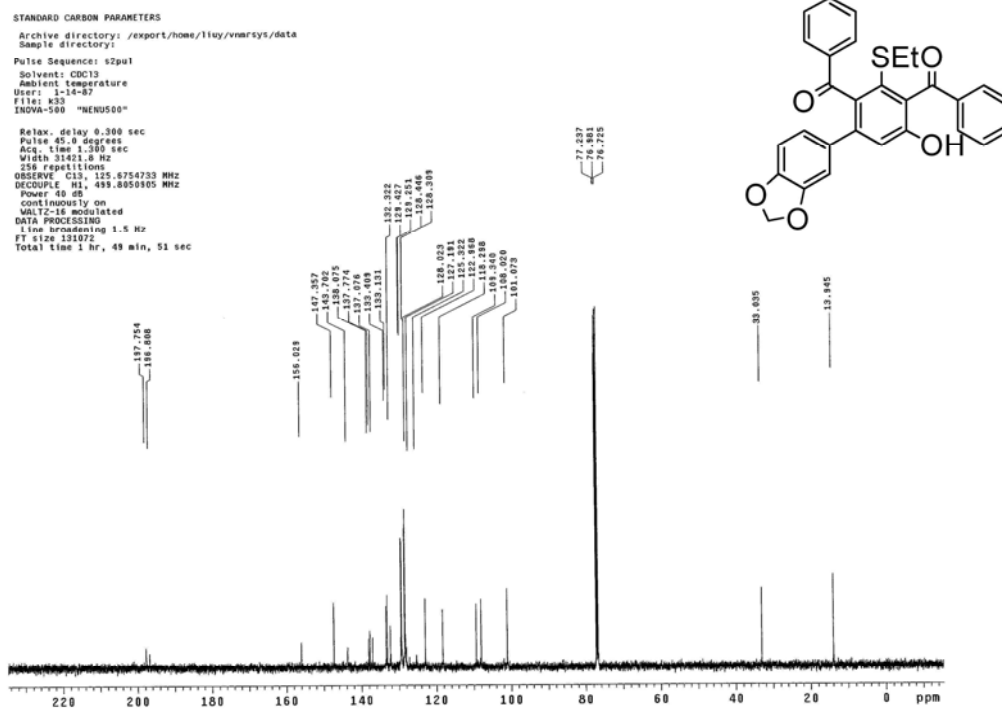

5f

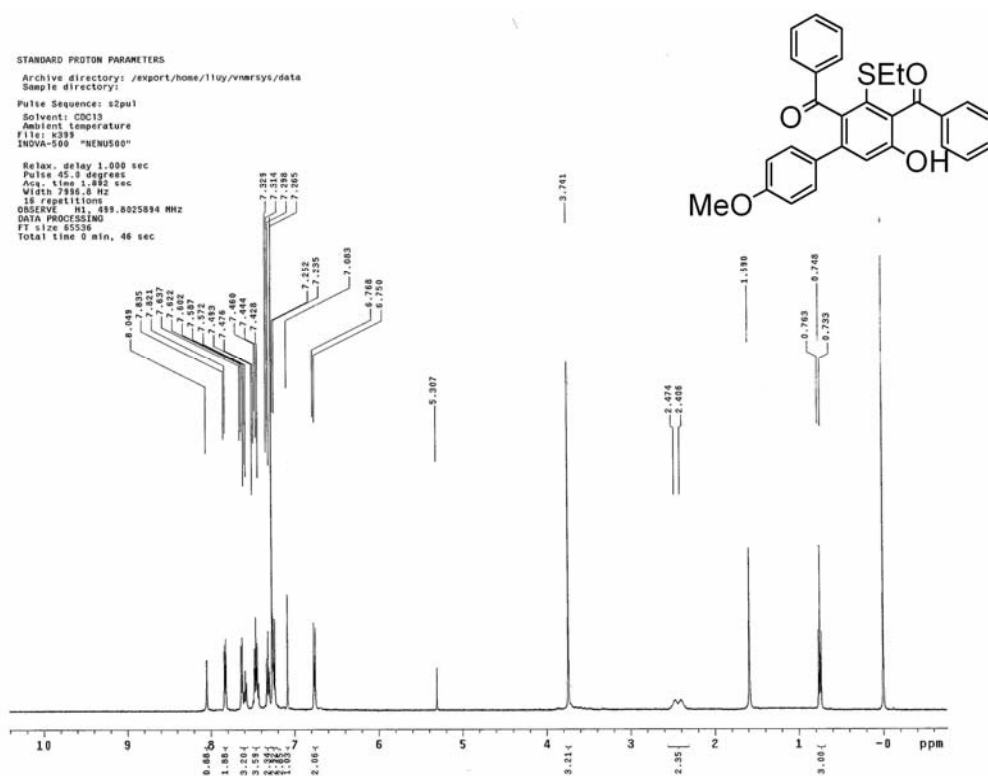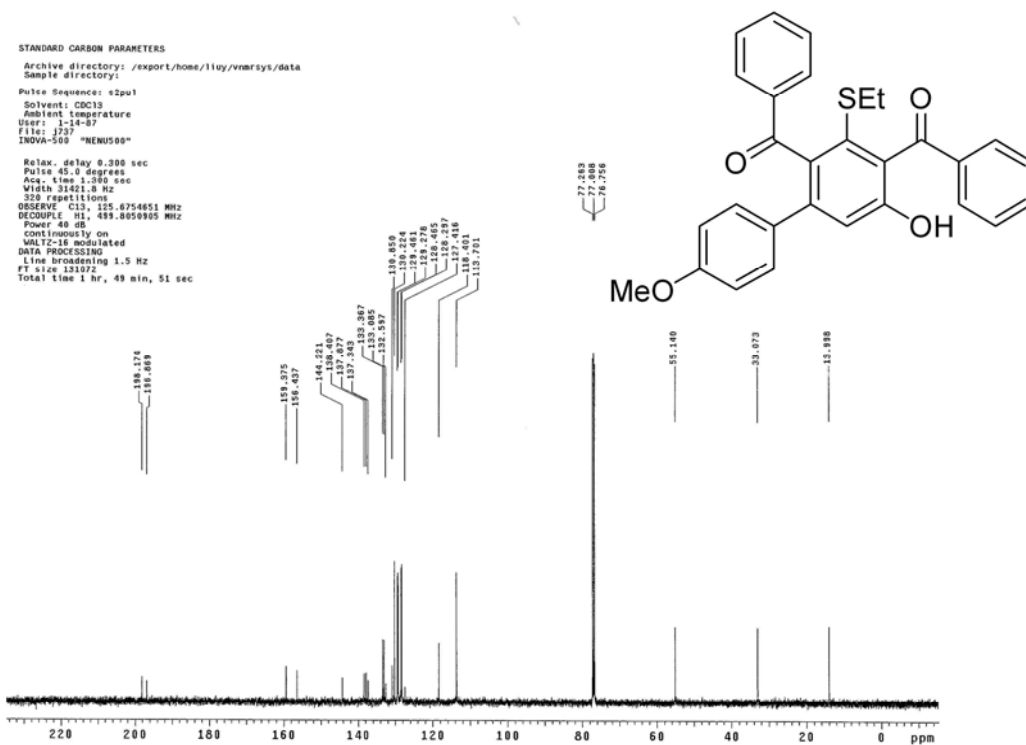

5g

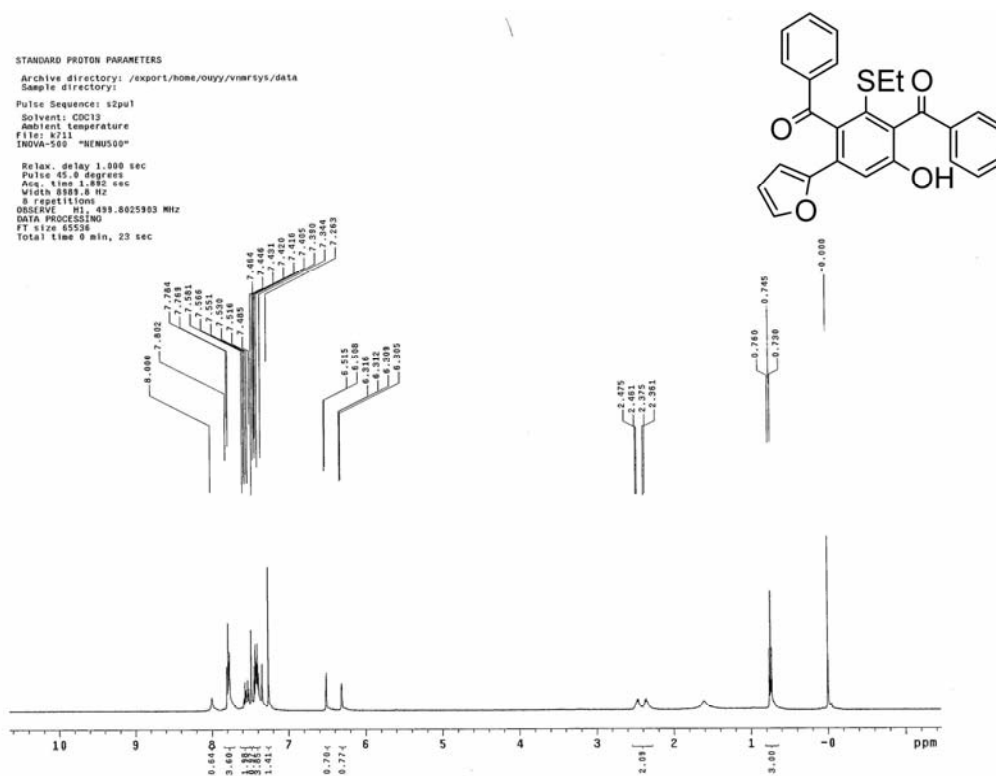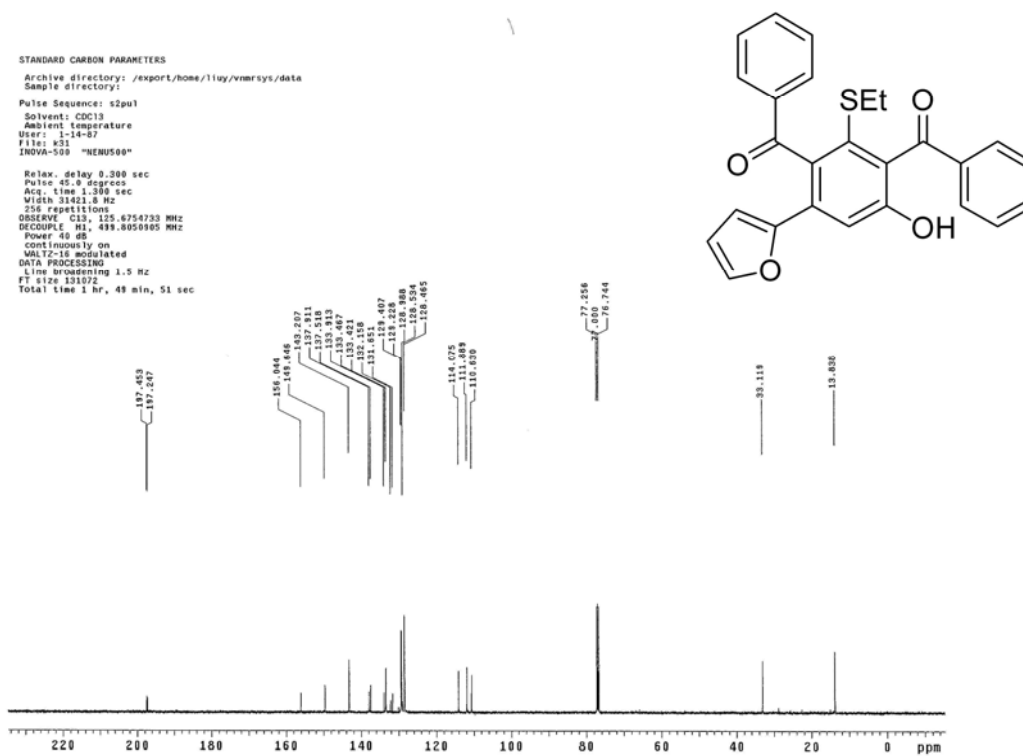



5i

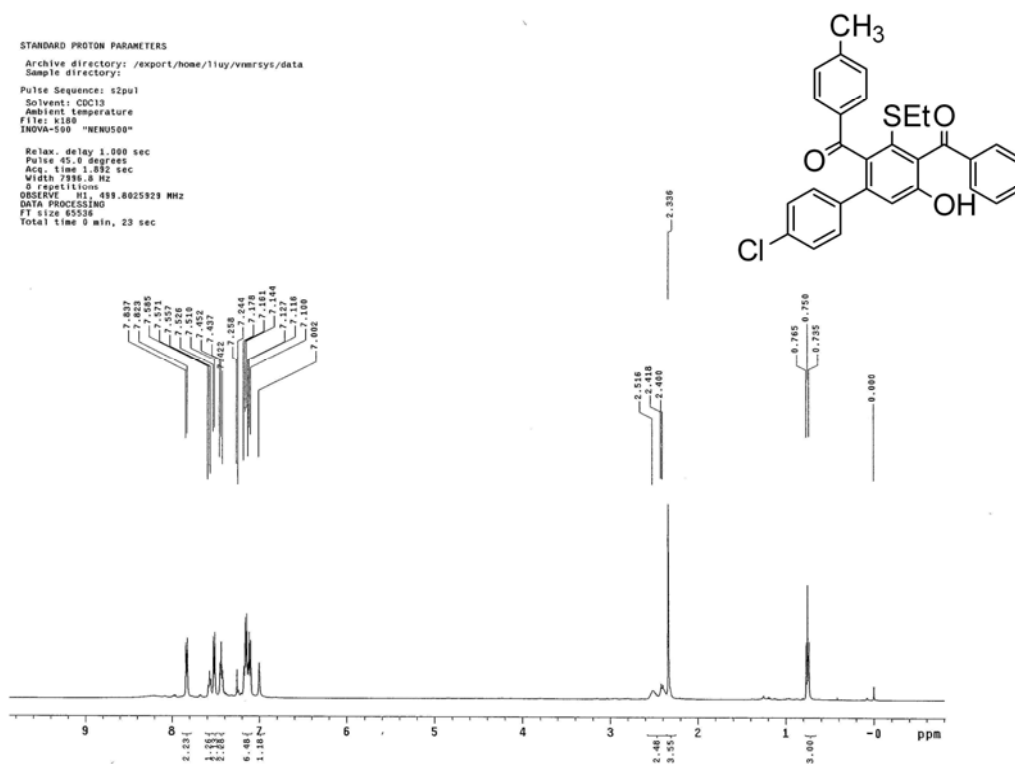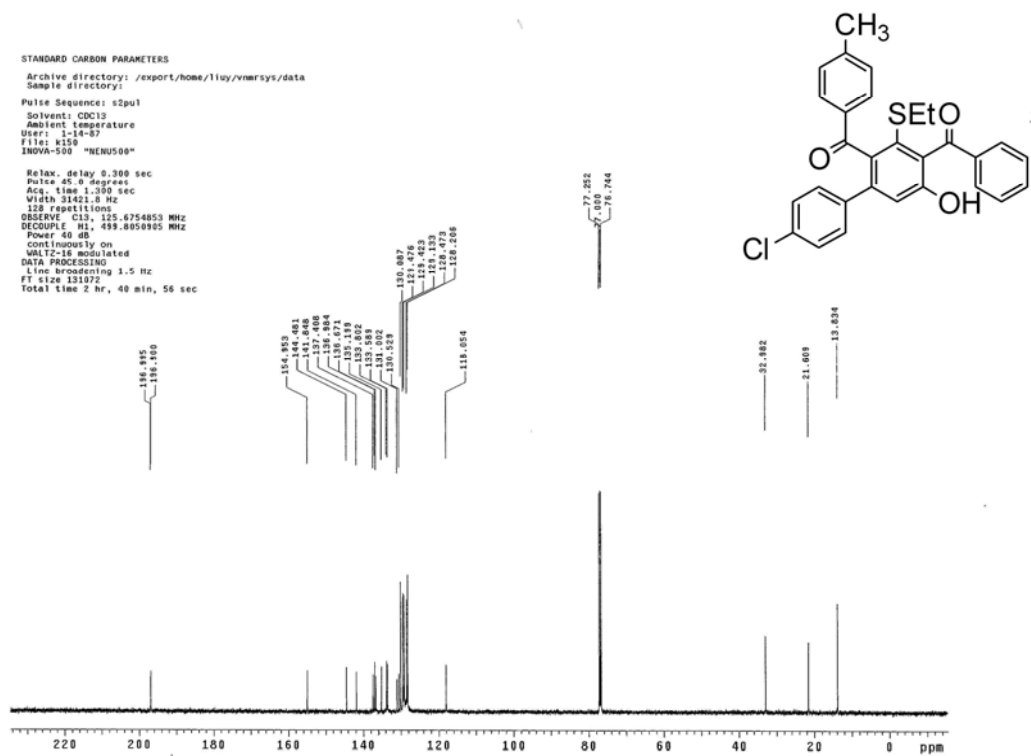

5j

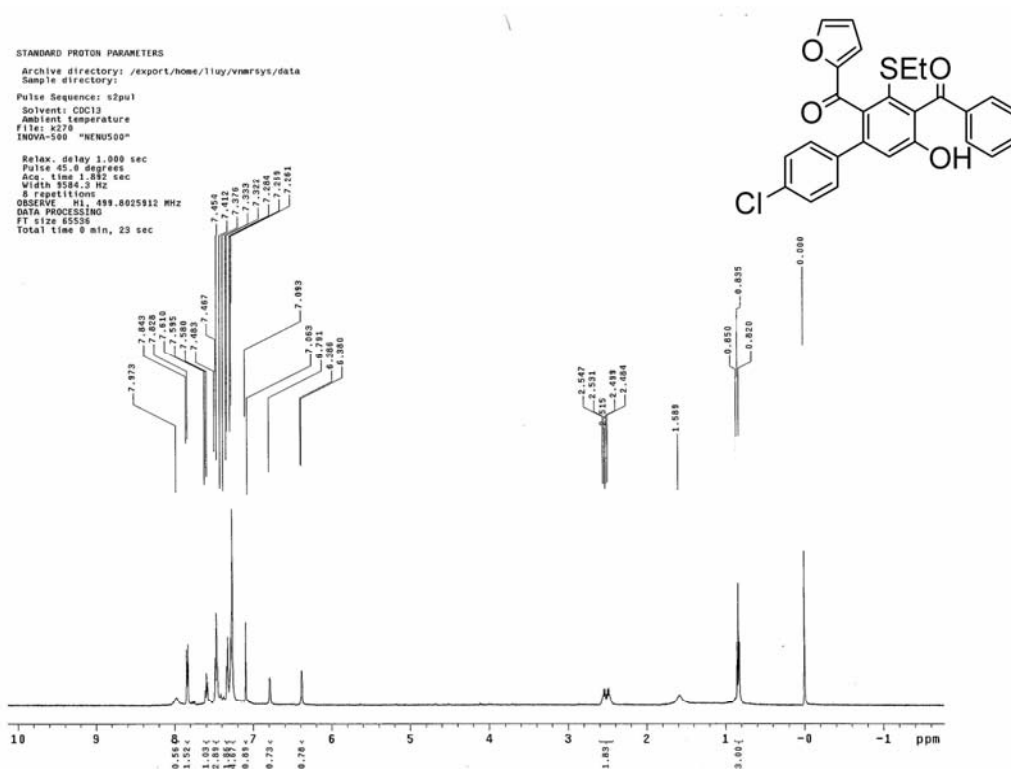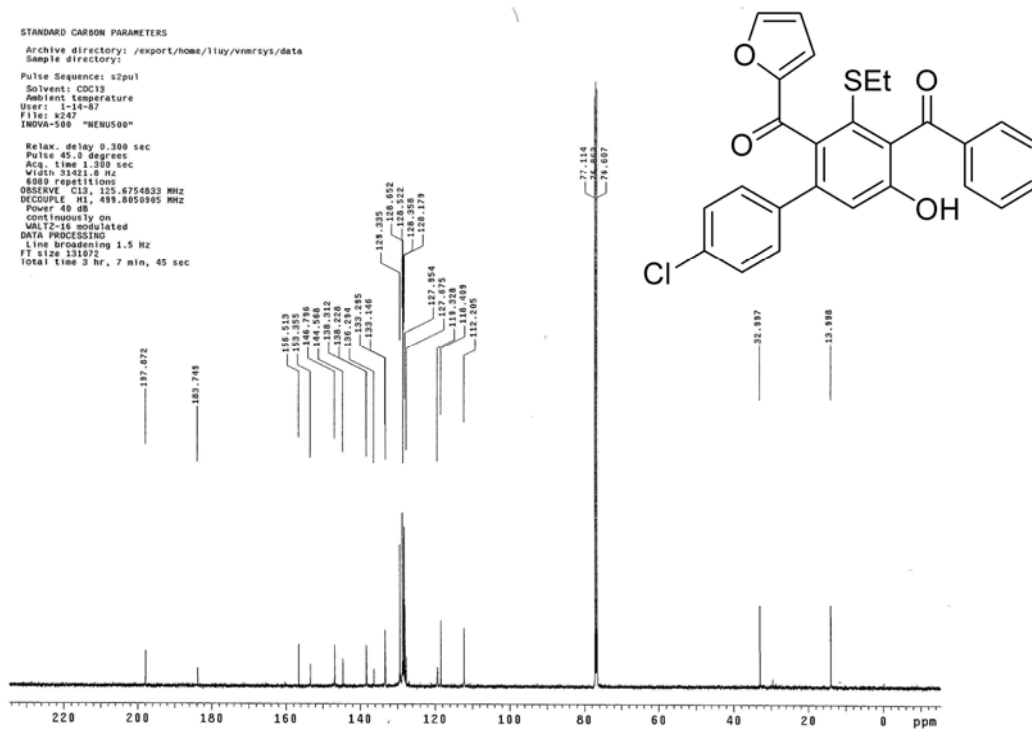

5k

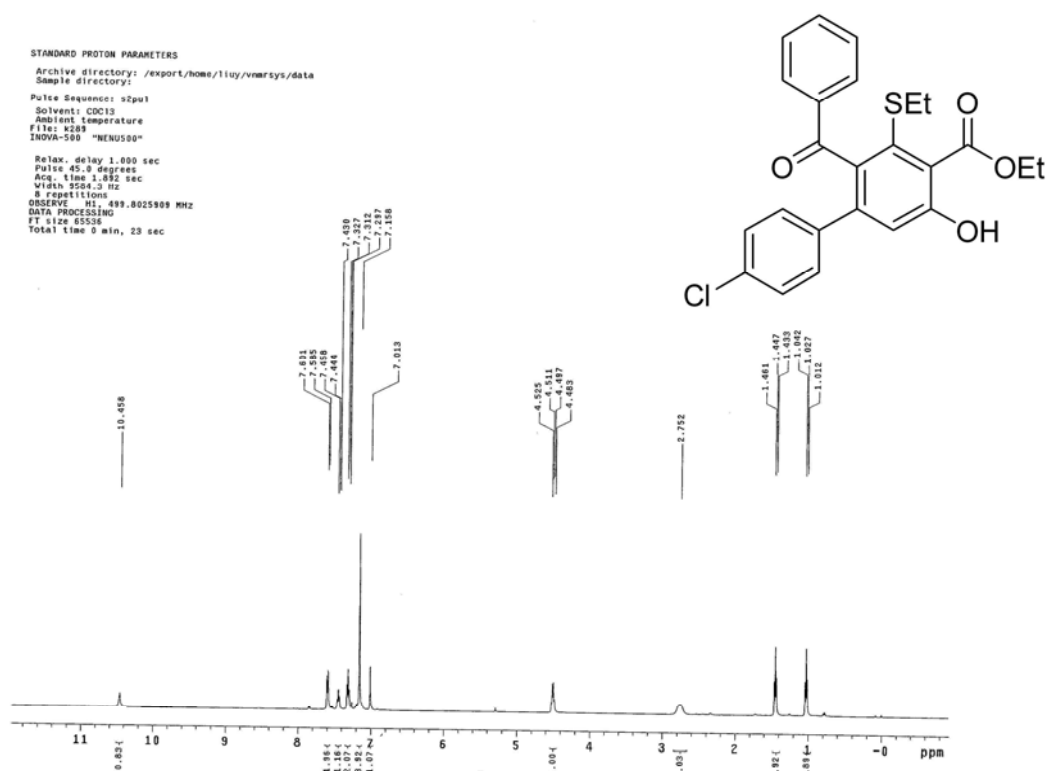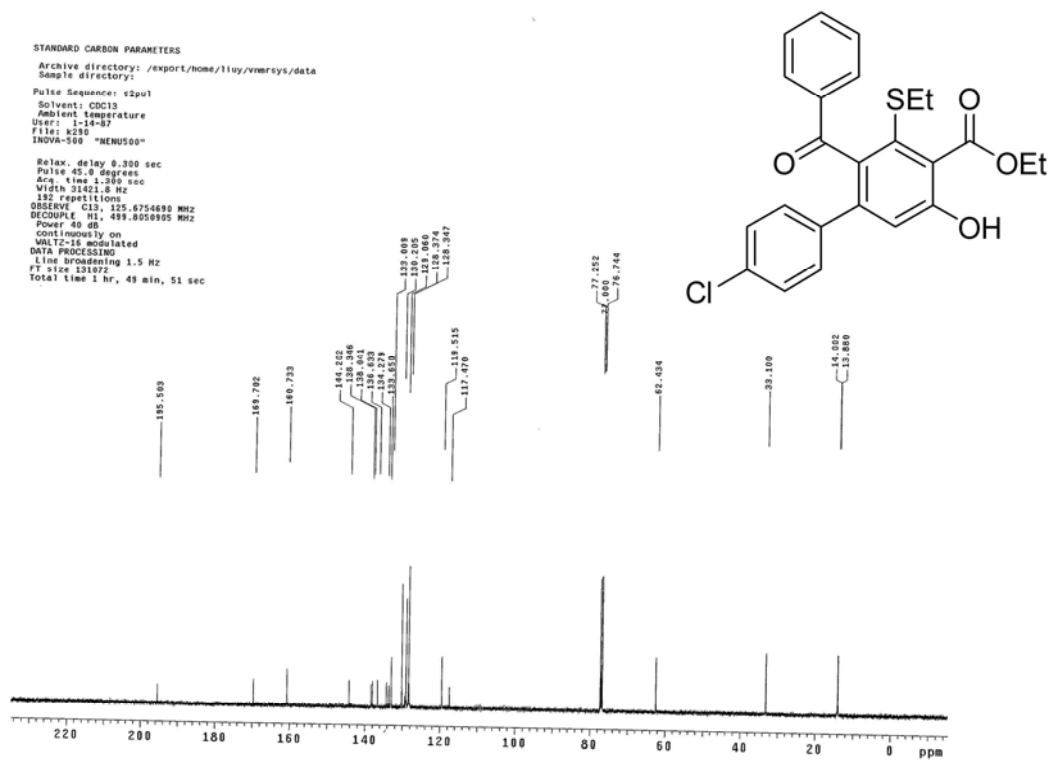

51

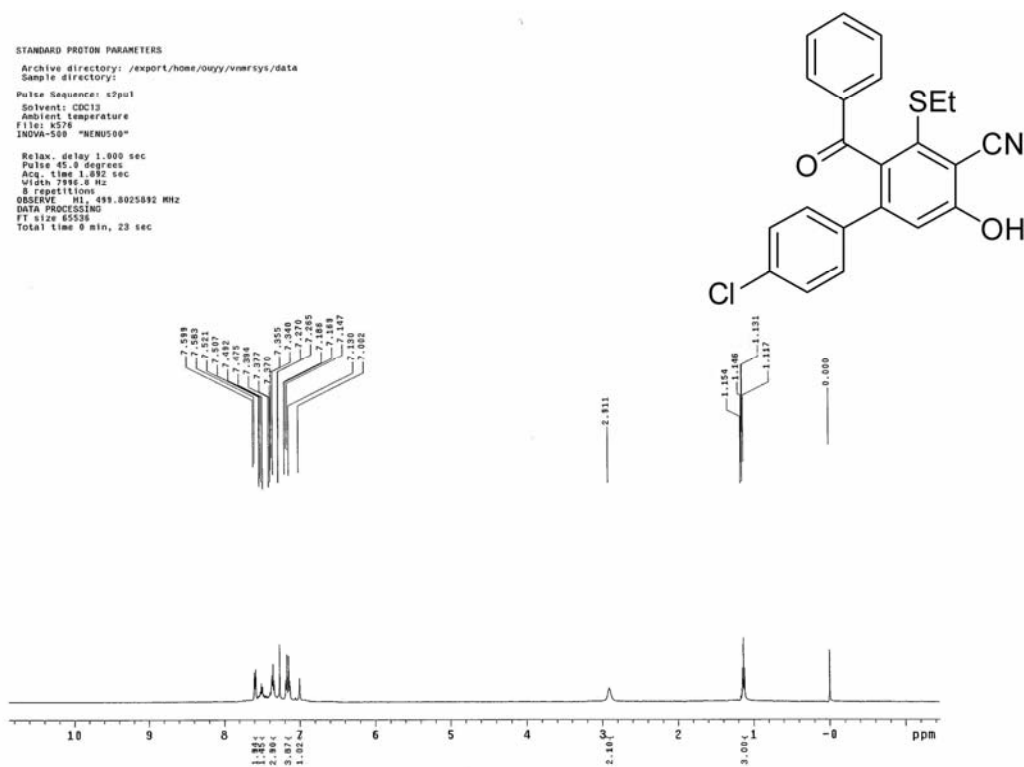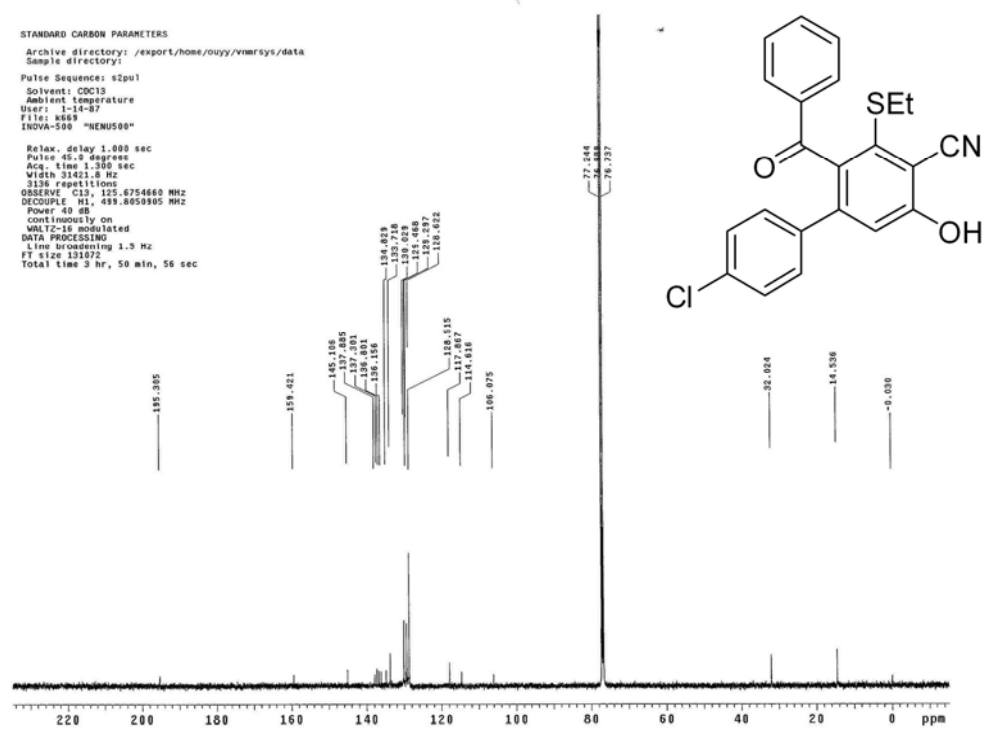



5m

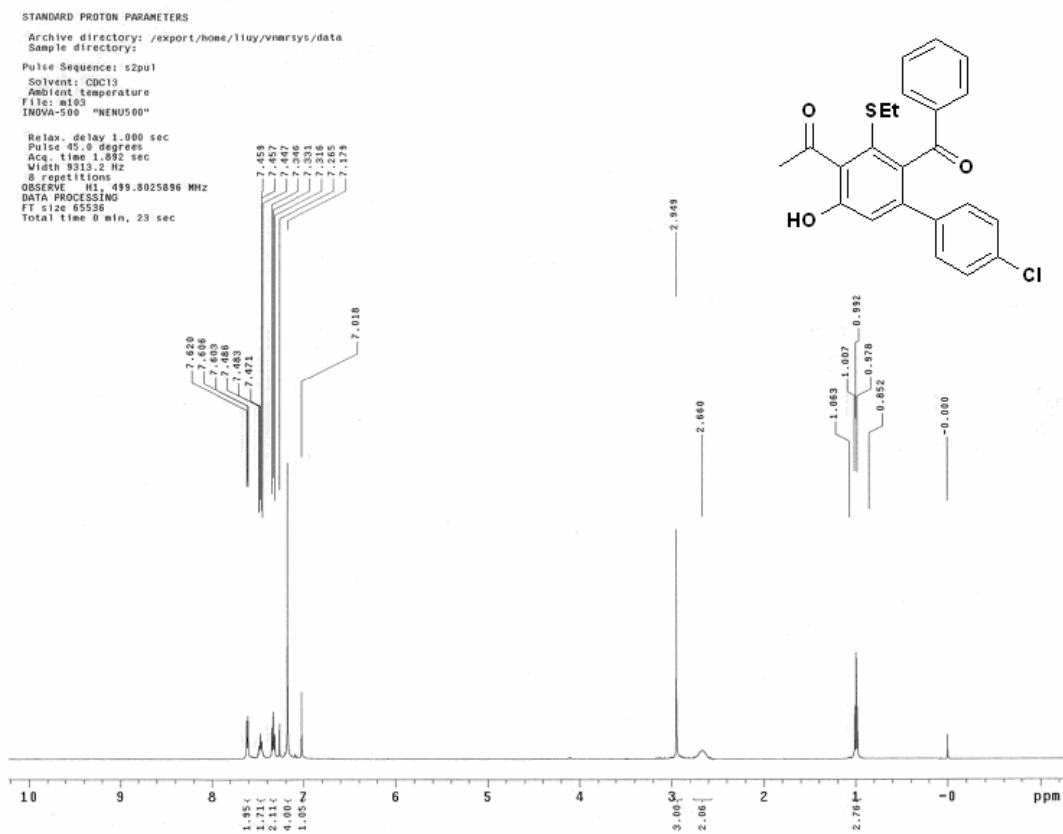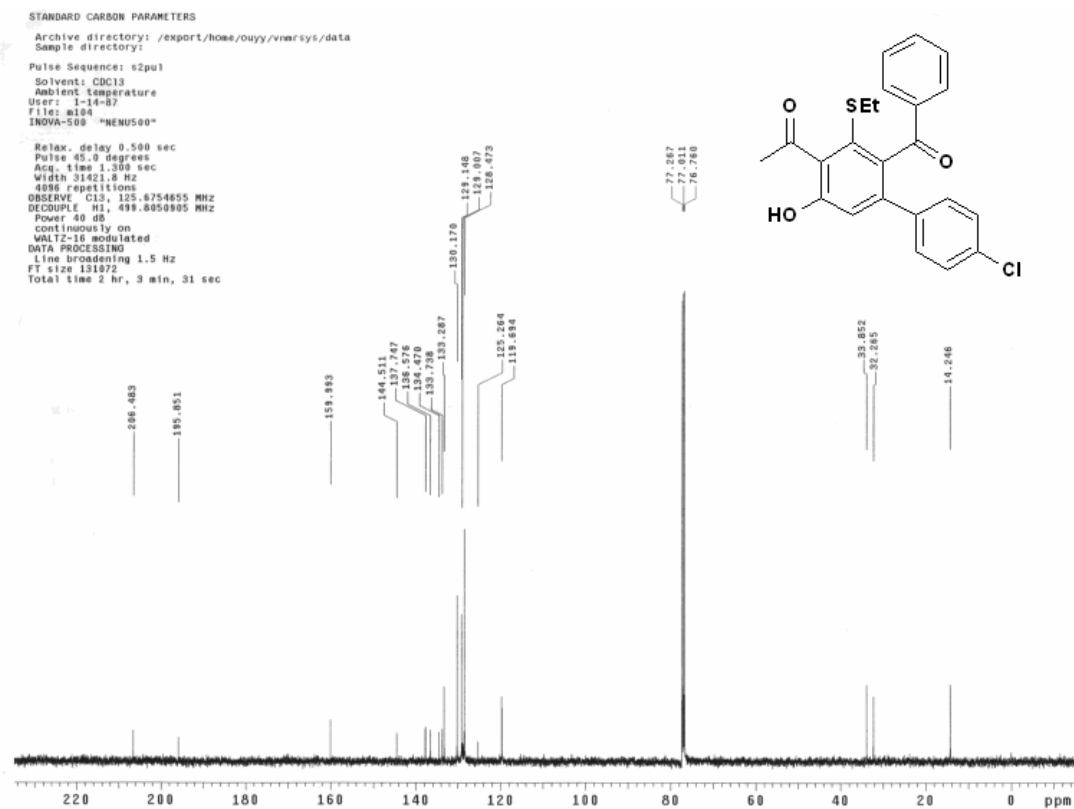

5n

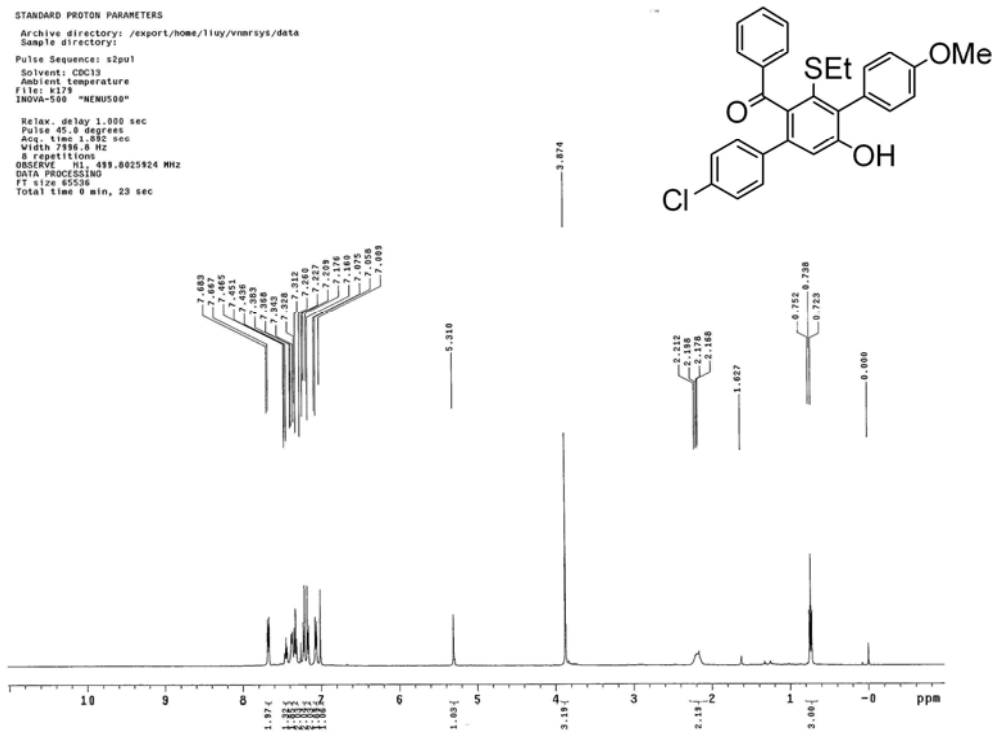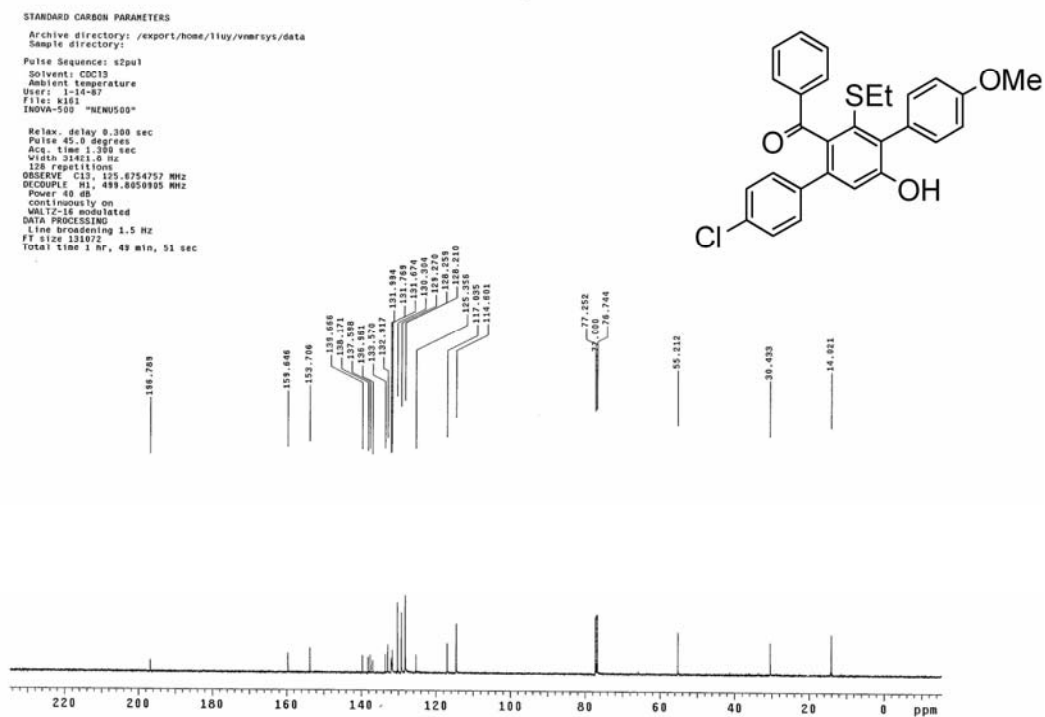

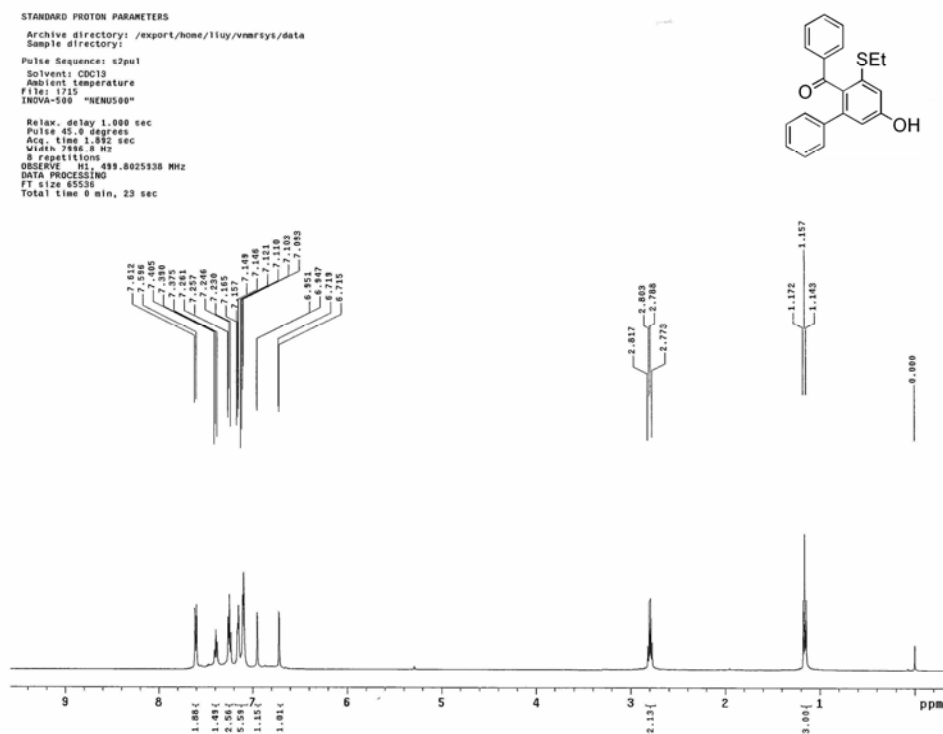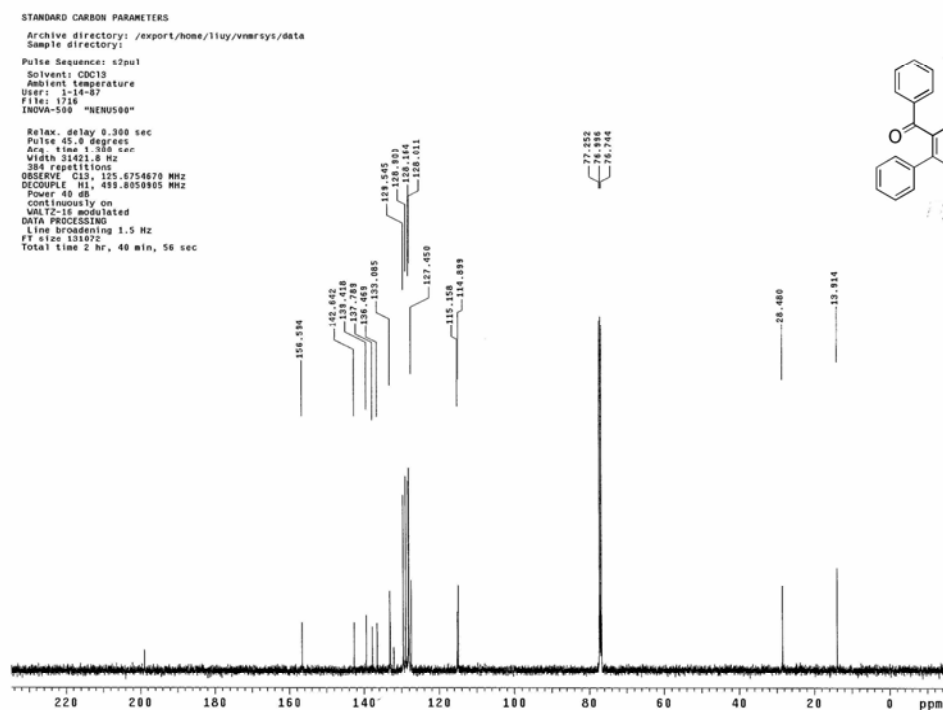

5p

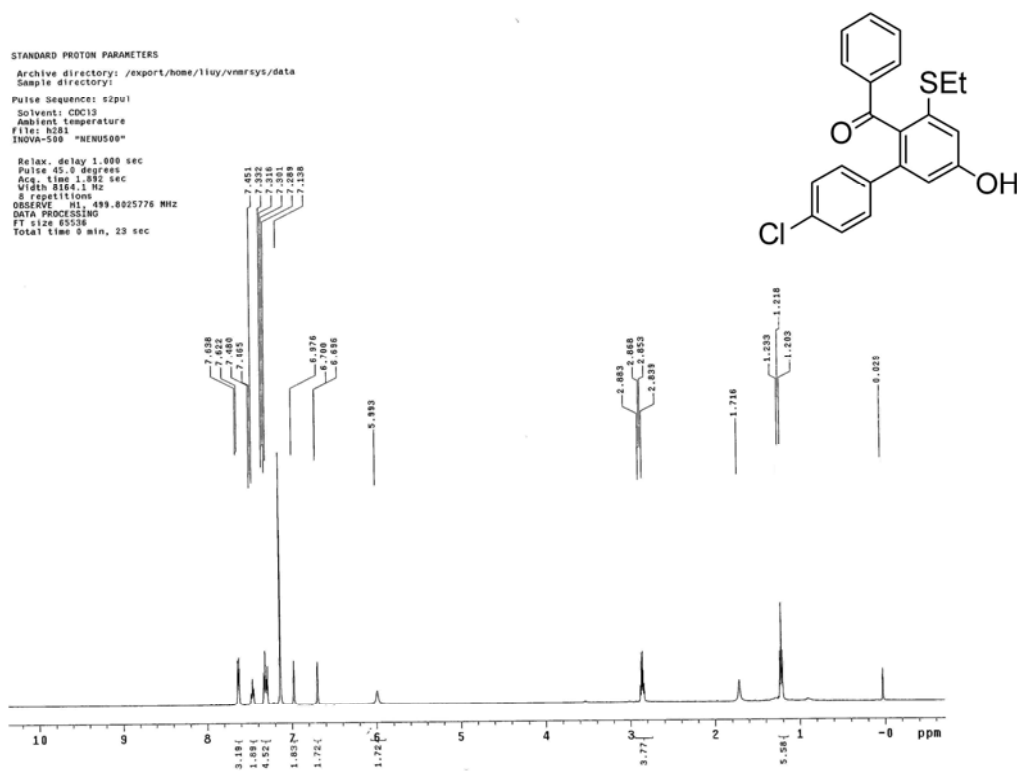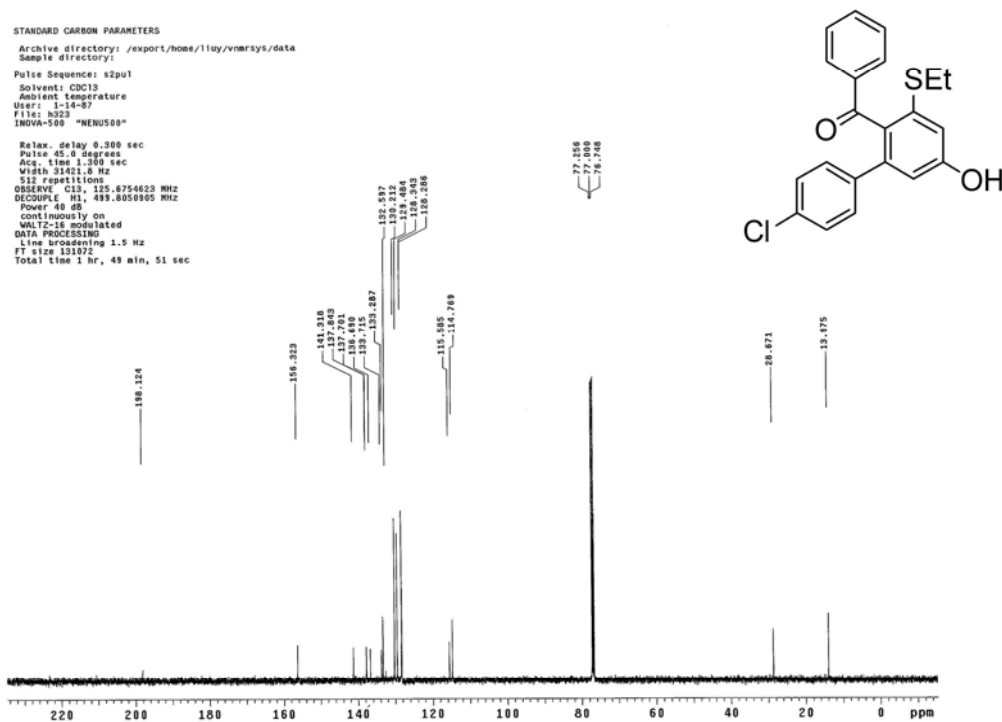

Supplement: c0cc02313b.pdf [file c0cc02313b.pdf]
